# Supplementary material
Source: publisher site journal article supplement (http://static.cambridge.org/content/id/urn:cambridge.org:id:article:S1355617719001103/resource/name/S1355617719001103supp002.xlsx)
Supplement: Supplementary file 1 [file S1355617719001103supp002.xlsx]

## Sheet: Sheet1
													Raw Difference		STANDARDISED EFFECT SIZE
							EXP group			Comparison group			Confidence Interval for Difference				Confidence Interval for Effect Size
Group	Comparison group	Paper	Domain	Details	Test	Outcome measure	mean	n	SD	mean	n	SD	lower	upper	Effect Size (Cohen's d)	Bias corrected (Hedges)	lower	upper
PD-MCI	HC	Anderson (2013)	EF	Frontal	Frontal-assessment-battery	Frontal Assessment Battery	15.2	19	2.57	17.4	21	1.1	-3.44379	-0.956205	-1.13374	-1.11118	-1.77781	-0.444545
PD-MCI	HC	Anderson (2013)	EF	EF	Hayling Sentence Completion	Hayling Sentence Completion	4	19	2.12	6.1	21	1	-3.14446	-1.05554	-1.28875	-1.2631	-1.9426	-0.583601
PD-MCI	HC	Anderson (2013)	EF	EF	Modified 6-Elements	Modified 6-Elements	3.1	19	0.97	3.4	21	0.9	-0.898547	0.298547	-0.321264	-0.314871	-0.939266	0.309525
PD-MCI	HC	Anderson (2013)	EF	Set-shifting	Rule Shift	Rule Shift	2.3	19	1.06	3.4	21	0.6	-1.64453	-0.555474	-1.29483	-1.26906	-1.94909	-0.589031
PD-MCI	HC	Biundo (2014)	EF	EF	Trail Making Test B	Trails B (seconds, reversed)	-259.184	49	172.096	-78.667	18	94.4887	-266.156	-94.8778	-1.16026	-1.14661	-1.72064	-0.572591
PD-MCI	HC	Biundo (2014)	EF	Verbal fluency	Verbal fluency phonemic	Phonemic fluency: "phonological" unspecified	34.551	49	9.6243	36.556	18	9.2242	-7.24591	3.23591	-0.210581	-0.208103	-0.749447	0.33324
PD-MCI	HC	Biundo (2014)	EF	Verbal fluency	Verbal fluency unspecified	Semantic fluency: category unspecified	37.959	49	7.9476	44.667	18	9.3808	-11.3021	-2.11388	-0.803716	-0.79426	-1.35094	-0.237577
PD-MCI	HC	Biundo (2014)	VS-WM	VS-WM	Corsi Test	Corsi Test	4.954	49	0.9705	5.218	18	1.6867	-0.924438	0.396438	-0.220031	-0.217442	-0.758891	0.324007
PD-MCI	HC	Biundo (2014)	VerbalWM	WM-Digit-ordering	Digit Ordering Test	Digit Ordering Test	4.143	49	1.7078	6.833	18	2.4314	-3.74878	-1.63122	-1.39848	-1.38203	-1.97073	-0.793328
PD-MCI	HC	Biundo (2014)	WMcapacity-digitF	WM-Digit-forward	Digit span forward	Digit span forward	5.209	49	0.9991	5.389	18	1.1188	-0.747917	0.387917	-0.174461	-0.172409	-0.713393	0.368575
PD-MCI	HC	Biundo (2014)	Att-Psychomotor	Psychomotor	Trail Making Test A	Trails A (seconds, reversed)	-51.204	49	58.1836	-27.944	18	13.8244	-51.0555	4.5355	-0.460624	-0.455205	-1.00087	0.0904616
PD-MCI	HC	Biundo (2014)	Verbal-naming	Naming	Naming task	Naming task (Novelli, 1986)	25.347	49	2.1169	27.833	18	1.7235	-3.59867	-1.37333	-1.22983	-1.21536	-1.79342	-0.637299
PD-MCI	HC	Biundo (2014)	Verbal-learning&memory	Verbal-memory	Prose memory tests	Prose memory tests	13.133	49	4.6891	16.139	18	4.0432	-5.49899	-0.513009	-0.663712	-0.655903	-1.2074	-0.10441
PD-MCI	HC	Biundo (2014)	Verbal-learning&memory	Verbal-similarities	Similarities (WAIS-IV)	Similiarities (WAIS-IV)	8.02	49	3.2691	11	18	1.9403	-4.61996	-1.34004	-1.00022	-0.988448	-1.55397	-0.422921
PD-MCI	HC	Biundo (2014)	Verbal-learning&memory	Verbal	Word Paired-Associated task	Word Paired-Associated task (Novelli et al, 1996)	9.139	49	3.0683	12.111	18	3.458	-4.71957	-1.22443	-0.936109	-0.925096	-1.48754	-0.36265
PD-MCI	HC	Biundo (2014)	VS-constructive	VS-figurecopy	Clock Drawing Test	Clock Drawing Test (free drawing)	12.796	49	2.3002	14.667	18	0.5941	-2.97181	-0.770192	-0.935564	-0.924557	-1.48698	-0.362137
PD-MCI	HC	Biundo (2014)	VS-learning&memory	VS-VOSP	Visual Object and Space Perception (VOSP)	Fragmented letters (VOSP)	17.51	49	2.8732	19.056	18	1.6968	-2.98656	-0.10544	-0.59073	-0.583781	-1.13294	-0.0346163
PD-MCI	HC	Biundo (2014)	VS-constructive	VS-figurecopy	Rey-Osterrieth Complex Figure	Rey-Osterrieth Complex Figure: copy	31.168	49	4.6922	33.986	18	4.5685	-5.38315	-0.252852	-0.6047	-0.597586	-1.14718	-0.0479957
PD-MCI	HC	Biundo (2014)	VS-learning&memory	VS-figurecopy-recall-delayed	Rey-Osterrieth Complex Figure	Rey-Osterrieth Complex Figure: delayed recall (10 min)	13.653	49	5.9947	18.875	18	5.7492	-8.48693	-1.95707	-0.880388	-0.870031	-1.42995	-0.31011
PD-MCI	HC	Bocanegra (2015)	Verbal-learning&memory	Verbal	Kissing and Dancing Test	Kissing and Dancing Test (Bak & Hodges, 2003)	46.7	17	3.4	50.59	17	1.28	-5.68479	-2.09521	-1.51427	-1.47854	-2.23711	-0.719963
PD-MCI	HC	Bocanegra (2015)	Verbal-language	Verbal-language-semantic	Pyramids and Palm Trees	Pyramids and Palm Trees	47.12	17	3.14	50.71	17	1.21	-5.25244	-1.92756	-1.50874	-1.47314	-2.23112	-0.715158
MCI-DLB	MCI-AD	Cagnin (2015)	EF	Digit span backward	Digit backward	Digit span backward	3	25	1.2	3.9	28	0.6	-1.41473	-0.385268	-0.965881	-0.951297	-1.5202	-0.382395
MCI-DLB	MCI-AD	Cagnin (2015)	EF	Verbal fluency	Verbal fluency letter	Verbal fluency (letter)	22.3	25	10.1	30.5	28	9	-13.4664	-2.9336	-0.860127	-0.84714	-1.41004	-0.284236
MCI-DLB	MCI-AD	Cagnin (2015)	WM/att	WM-Digit-cancellation	Digit cancellation	Digit cancellation	41.8	25	8.2	43.7	28	9.1	-6.6994	2.8994	-0.21869	-0.215388	-0.756253	0.325477
MCI-DLB	MCI-AD	Cagnin (2015)	WMcapacity-digitF	WM-Digit-forward	Digit span forward	Digit span forward	4.7	25	1	5.1	28	0.8	-0.89699	0.0969897	-0.444606	-0.437892	-0.983605	0.10782
MCI-DLB	MCI-AD	Cagnin (2015)	Att-Psychomotor	Psychomotor	Trail Making Test A	Trails A (seconds, reversed)	99	25	70.8	66.4	28	28	3.50544	61.6946	0.618968	0.609622	0.0579684	1.16128
MCI-DLB	MCI-AD	Cagnin (2015)	Verbal-learning&memory	Verbal-memory-recall-delay	Prose memory tests	Prose memory delayed recall	11.4	25	5.8	7.7	28	5.4	0.611026	6.78897	0.661683	0.651692	0.098298	1.20509
MCI-DLB	MCI-AD	Cagnin (2015)	Verbal-learning&memory	Verbal-memory-recall-immediate	Prose memory tests	Prose memory immediate recall	10.7	25	4.6	8.2	28	5.9	-0.44319	5.44319	0.469228	0.462143	-0.0842939	1.00858
MCI-DLB	MCI-AD	Cagnin (2015)	VS-learning&memory	VS-VOSP	Visual Object and Space Perception (VOSP)	Cube analysis: VOSP (cutoff>=6)	7.3	25	2	8.8	28	2.2	-2.66462	-0.33538	-0.711492	-0.700748	-1.25631	-0.145186
MCI-DLB	MCI-AD	Cagnin (2015)	VS-spatial-perception	VS-VOSP	Visual Object and Space Perception (VOSP)	Dot counting: VOSP (cutoff>=15)	9.4	25	0.7	9.6	28	1.3	-0.785997	0.385997	-0.188537	-0.18569	-0.726156	0.354775
MCI-DLB	MCI-AD	Cagnin (2015)	VS-learning&memory	VS-VOSP	Visual Object and Space Perception (VOSP)	Fragmented letters: VOSP (cutoff>=16)	16.7	25	4.2	17.3	28	3.7	-2.77827	1.57827	-0.152161	-0.149863	-0.689925	0.390199
MCI-DLB	MCI-AD	Cagnin (2015)	VS-spatial-perception	VS-VOSP	Visual Object and Space Perception (VOSP)	Number location: VOSP (cutoff>=7)	7.6	25	1.8	8.9	28	2.5	-2.51449	-0.0855077	-0.591304	-0.582376	-1.13296	-0.0317901
MCI-DLB	MCI-AD	Cagnin (2015)	VS-visual-perception	VS-VOSP	Visual Object and Space Perception (VOSP)	Object decision: VOSP (cutoff>=14)	12.6	25	3.1	14.6	28	3.8	-3.92688	-0.0731168	-0.573373	-0.564715	-1.11463	-0.0147965
MCI-DLB	MCI-AD	Cagnin (2015)	VS-spatial-perception	VS-VOSP	Visual Object and Space Perception (VOSP)	Position discrimination: VOSP (cutoff>=18)	18.5	25	1.8	19.1	28	1.8	-1.59434	0.39434	-0.333333	-0.3283	-0.871217	0.214617
MCI-DLB	MCI-AD	Cagnin (2015)	VS-visual-perception	VS-VOSP	Visual Object and Space Perception (VOSP)	Progressive silhouettes: VOSP (cutoff>=15)	11.9	25	2.3	11.8	28	2.6	-1.2608	1.4608	0.0405946	0.0399817	-0.49938	0.579344
MCI-DLB	MCI-AD	Cagnin (2015)	VS-constructive	VS-figurecopy	Rey-Osterrieth Complex Figure	Rey-Osterrieth Complex Figure: copy	2.1	25	4.9	31.1	28	7.2	-32.4384	-25.5616	-4.65906	-4.58871	-5.61532	-3.5621
MCI-DLB	MCI-AD	Cagnin (2015)	VS-learning&memory	VS-figurecopy-recall-delayed	Rey-Osterrieth Complex Figure	Rey-Osterrieth Complex Figure: delayed recall	8.9	25	4.5	8.6	28	5.4	-2.46024	3.06024	0.0600396	0.059133	-0.480293	0.598559
MCI-DLB	MCI-AD	Cagnin (2015)	VS-visual-perception	VS-VOSP	Visual Object and Space Perception (VOSP)	Silhouettes: VOSP (cutoff>=15)	13.9	25	7.2	15.2	28	5.1	-4.71269	2.11269	-0.210431	-0.207253	-0.748003	0.333496
PD-MCI	HC	Costa (2015)	EF	EF	Card sorting	Card Sorting: categories Achieved (Modified)	3.9	48	1.9	5.7	20	0.7	-2.67505	-0.924951	-1.09306	-1.08059	-1.63293	-0.528242
PD-MCI	HC	Costa (2015)	EF	EF	Card sorting	Card Sorting: perseverative errors (Modified)	-5.2	48	5.2	-2	20	2.3	-5.6222	-0.777796	-0.702007	-0.693999	-1.22852	-0.159483
PD-MCI	HC	Costa (2015)	EF	EF	Trail Making Test B	Trails B (seconds, reversed)	-227.8	48	105.3	-102.1	20	36.6	-174.057	-77.3427	-1.38126	-1.3655	-1.93539	-0.795618
PD-MCI	HC	Costa (2015)	EF	Verbal fluency	Verbal fluency phonemic	Phonemic fluency: "phonological" unspecified	25.6	48	9.9	35.7	20	5.4	-14.7987	-5.40131	-1.14221	-1.12918	-1.68427	-0.574099
PD-MCI	HC	Costa (2015)	VS-WM	VS-WM	Corsi Test	Corsi Backward	4.1	48	1	4.6	20	0.7	-0.990821	-0.0091792	-0.541314	-0.535139	-1.06447	-0.00580735
PD-MCI	HC	Costa (2015)	VS-WM	VS-WM	Corsi Test	Corsi Test	4.7	48	0.9	4.9	20	0.8	-0.663566	0.263566	-0.229256	-0.226641	-0.749665	0.296383
PD-MCI	HC	Costa (2015)	Verbal-WM-DigitB	WM/att-Digit-backward	Digit span backward	Digit span backward	3.8	48	1.5	4.2	20	0.7	-1.1016	0.301605	-0.302949	-0.299493	-0.823552	0.224565
PD-MCI	HC	Costa (2015)	WMcapacity-digitF	WM-Digit-forward	Digit span forward	Digit span forward	5.5	48	1.1	5.9	20	0.8	-0.943437	0.143437	-0.391123	-0.386661	-0.912329	0.139006
PD-MCI	HC	Costa (2015)	Att-Psychomotor	Psychomotor	Trail Making Test A	Trails A (Giovagnoli, 1996)	-66.5	48	27.6	-37.2	20	13.9	-42.2952	-16.3048	-1.19808	-1.18441	-1.74274	-0.626087
PD-MCI	HC	Costa (2015)	Verbal-learning&memory	Verbal-memory-recall-delay	Prose memory tests	Prose Recall: Delayed	4.8	48	1.6	5.7	20	1.1	-1.68301	-0.116988	-0.610768	-0.603801	-1.13522	-0.0723867
PD-MCI	HC	Costa (2015)	Verbal-learning&memory	Verbal-memory-recall-immediate	Prose memory tests	Prose Recall: Immediate	5.1	48	1.5	5.9	20	1.2	-1.55463	-0.0453674	-0.563322	-0.556896	-1.08686	-0.0269307
PD-MCI	HC	Costa (2015)	Verbal-wordlist	Verbal-memory	Rey Auditory Verbal Learning Test (RAVLT)	Learning Total	29.8	48	9.1	46	20	9	-21.0203	-11.3797	-1.78585	-1.76548	-2.3656	-1.16536
PD-MCI	HC	Costa (2015)	Verbal-wordlist	Verbal-memory-delay	Rey Auditory Verbal Learning Test (RAVLT)	Delayed Recall (20 min)	5.8	48	2.4	9.7	20	2.3	-5.16024	-2.63976	-1.64443	-1.62567	-2.21453	-1.03681
PD-MCI	HC	Costa (2015)	VS-constructive	VS-figurecopy	Drawings Copy	Drawings Copy (Carlesimo 2002)	8.6	48	1.5	10.4	20	1.3	-2.56798	-1.03202	-1.24545	-1.23124	-1.79242	-0.670061
PD-MCI	HC	Costa (2015)	VS-constructive	VS-figurecopy	Rey Complex Figure (Carlesimo 2002)	Rey Complex Figure Copy (Carlesimo 2002)	27.2	48	5.5	32.4	20	2.6	-7.77527	-2.62473	-1.07296	-1.06072	-1.61198	-0.509463
PD-MCI	HC	Costa (2015)	VS-learning&memory	VS-figurecopy-recall-delayed	Rey Complex Figure Test (RCFT)	Rey-Osterrieth Complex Figure: delayed recall (20 min)	9.2	48	5.9	16.4	20	6.1	-10.3661	-4.03392	-1.20841	-1.19462	-1.75356	-0.635682
PD-MCI	HC	Costa (2015)	VS-learning&memory	VS-figurecopy-recall-immediate	Rey Complex Figure Test (RCFT)	Rey-Osterrieth Complex Figure: immediate recall	10	48	6.3	17	20	7.1	-10.4754	-3.52462	-1.07028	-1.05807	-1.60918	-0.506959
PD-MCI	HC	Dalrymple (2011)	EF	Inhibition	Stroop	Stroop Color-Word Test: interference index	-0.94	36	1.3	0.52	50	0.5	-1.86075	-1.05925	-1.58359	-1.5687	-2.05706	-1.08034
PD-MCI	HC	Dalrymple (2011)	EF	EF	Trail Making Test B	Trails B (seconds, reversed)	-1.07	36	1.1	0.69	50	0.5	-2.11044	-1.40956	-2.18301	-2.16248	-2.69912	-1.62585
PD-MCI	HC	Dalrymple (2011)	EF	Verbal fluency	Verbal fluency category switch	Semantic fluency: category swtich	-0.63	36	1	0.86	50	1.2	-1.97727	-1.00273	-1.32916	-1.31666	-1.7881	-0.845218
PD-MCI	HC	Dalrymple (2011)	EF	Verbal fluency	Verbal fluency phonemic	Phonemic fluency (D-KEFS)	0.07	36	1.3	0.8	50	1.2	-1.27014	-0.189856	-0.587457	-0.581932	-1.01908	-0.144782
PD-MCI	HC	Dalrymple (2011)	EF	Verbal fluency	Verbal fluency unspecified	Action (verb) fluency	-0.81	36	0.9	0.66	50	1	-1.88711	-1.05289	-1.53189	-1.51748	-2.00221	-1.03275
PD-MCI	HC	Dalrymple (2011)	EF	Verbal fluency	Verbal fluency unspecified	Semantic fluency: category unspecified	-0.08	36	1	1.31	50	0.9	-1.79988	-0.980122	-1.47409	-1.46022	-1.94101	-0.979435
PD-MCI	HC	Dalrymple (2011)	VerbalWM	WM-Digit-ordering	Digit Ordering Test	Digit Ordering Test	-1.63	36	0.8	-0.59	50	0.9	-1.41371	-0.666291	-1.20966	-1.19828	-1.66261	-0.733947
PD-MCI	HC	Dalrymple (2011)	Psychomotor	EF	Stroop	Stroop: color naming	-0.49	36	0.8	0.14	50	0.8	-0.977738	-0.282262	-0.7875	-0.780094	-1.22408	-0.336103
PD-MCI	HC	Dalrymple (2011)	Psychomotor	EF	Stroop	Stroop: word reading	-0.37	36	0.8	0.28	50	0.8	-0.997738	-0.302262	-0.8125	-0.804859	-1.24984	-0.359882
PD-MCI	HC	Dalrymple (2011)	Att-Psychomotor	Psychomotor	Trail Making Test B	Trails B (seconds, reversed)	-0.93	36	0.9	0.35	50	0.7	-1.62318	-0.936819	-1.62125	-1.606	-2.09706	-1.11494
PD-MCI	HC	Dalrymple (2011)	Verbal-wordlist	Verbal-memory-delay	California Verbal Learning Test (CVLT)	CVLT II-short form (10 min)	-0.5	36	0.9	0.72	50	0.8	-1.58648	-0.853523	-1.44702	-1.43342	-1.9124	-0.954432
PD-MCI	HC	Dalrymple (2011)	Verbal-wordlist	Verbal-memory	California Verbal Learning Test (CVLT)	CVLT II-short form (30s)	-0.79	36	1	0.92	50	1.2	-2.19727	-1.22273	-1.52541	-1.51106	-1.99535	-1.02678
PD-MCI	HC	Dalrymple (2011)	VS-Benton	VS-Benton	Benton JOLO	Benton Judgement of Line Orientation test	0.03	36	0.9	0.68	50	0.6	-0.971629	-0.328371	-0.878459	-0.870197	-1.31791	-0.422482
PD-MCI	HC	Dalrymple (2011)	VS-learning&memory	VS-VOSP	Visual Object and Space Perception (VOSP)	Fragmented letters	0.15	36	0.9	0.6	50	0.7	-0.793181	-0.106819	-0.56997	-0.56461	-1.00125	-0.127968
PD-MCI	HC	Dalrymple (2011)	VS-constructive	VS-figurecopy	Rey-Osterrieth Complex Figure	Rey-Osterrieth Complex Figure: copy	-0.85	36	1.3	0.24	50	0.8	-1.5412	-0.638798	-1.05007	-1.04019	-1.49594	-0.584451
PD-MCI	HC	Dalrymple (2011)	VS-learning&memory	VS-figurecopy-recall-delayed	Rey-Osterrieth Complex Figure	Rey-Osterrieth Complex Figure: delayed recall (30 min)	-0.85	36	1.2	0.84	50	1.4	-2.26392	-1.11608	-1.27996	-1.26792	-1.73637	-0.799477
PD-MCI	HC	Dalrymple (2011)	VS-learning&memory	VS-figurecopy-recall-delayed	Rey-Osterrieth Complex Figure	Rey-Osterrieth Complex Figure: short delay recall (3 min)	-0.76	36	1.4	1.08	50	1.2	-2.39947	-1.28053	-1.42955	-1.41611	-1.89394	-0.938276
PD-MCI	HC	Galtier (2016)	EF	EF	Card sorting	Card Sorting: categories Achieved (Wisconsin)	1.12	26	1.03	3.88	20	1.97	-3.66483	-1.85517	-1.82841	-1.79696	-2.48591	-1.10801
PD-MCI	HC	Galtier (2016)	EF	Inhibition	Stroop	Stroop Color-Word Test: interference index	-2.35	26	6.83	-4.67	20	7.97	-2.08215	6.72215	0.315904	0.31047	-0.275914	0.896854
PD-MCI	HC	Galtier (2016)	EF	Verbal fluency	Verbal fluency animals	Semantic fluency: animals	15.04	26	3.36	16.94	20	5.53	-4.5551	0.755096	-0.428948	-0.42157	-1.01084	0.167702
PD-MCI	HC	Galtier (2016)	EF	Verbal fluency	Verbal fluency phonemic	Phonemic fluency	18.27	26	6.86	26.06	20	9.6	-12.6794	-2.9006	-0.955021	-0.938595	-1.55228	-0.324913
PD-MCI	HC	Galtier (2016)	Verbal-WM-DigitB	WM/att-Digit-backward	Digit span backward	Digit span backward	4	26	1.47	4.41	20	1.37	-1.26578	0.445779	-0.28718	-0.28224	-0.868028	0.303548
PD-MCI	HC	Galtier (2016)	Verbal-wordlist	Verbal-memory	California Verbal Learning Test (CVLT)	CVLT	14.08	26	1.78	14.5	20	1.52	-1.42265	0.582646	-0.251092	-0.246773	-0.831892	0.338345
PD-MCI	HC	Galtier (2016)	Verbal-wordlist	Verbal-memory-delay	California Verbal Learning Test (CVLT)	CVLT (20 min)	9.48	26	3.57	12.06	20	4.07	-4.8542	-0.305798	-0.680021	-0.668325	-1.26705	-0.0695996
PD-MCI	HC	Galtier (2016)	Verbal-wordlist	Verbal-memory-delay	California Verbal Learning Test (CVLT)	CVLT cued; "long term" delay	10.2	29	3.27	13.06	20	3.13	-4.73941	-0.980594	-0.889818	-0.875492	-1.47096	-0.280024
PD-MCI	HC	Galtier (2016)	Verbal-naming	Naming	Naming test	Naming test (Druks & Masterson, 2000)	16.27	26	2.78	18.76	20	1.43	-3.8666	-1.1134	-1.08423	-1.06558	-1.68786	-0.443304
PD-MCI	HC	Galtier (2016)	VS-learning&memory	Spatial recall	8/30 Spatial Recall Test	8/30 Spatial Recall Test - Learning (7/24 SRT adaptation Barbizet & Cany, 1968)	22.08	26	6.59	30	20	7.73	-12.1787	-3.66127	-1.11475	-1.09557	-1.72002	-0.471123
PD-MCI	HC	Galtier (2016)	VS-learning&memory	Spatial recall	8/30 Spatial Recall Test	8/30 Spatial Recall Test - Long term (7/24 SRT adaptation Barbizet & Cany, 1968)	4.2	26	1.89	5.64	20	2	-2.60184	-0.278164	-0.742932	-0.730154	-1.33189	-0.128421
PD-MCI	HC	Galtier (2016)	VS-Benton	VS-Benton	Benton JOLO	Benton Judgement of Line Orientation test	9.2	26	3.44	13.41	20	1.33	-5.85021	-2.56979	-1.53856	-1.5121	-2.17186	-0.85233
PD-MCI	HC	Galtier (2016)	VS-learning&memory	VS-block-design	Block design (WAIS-III)	Block design (WAIS-III)	8	26	5.14	15.29	20	4.06	-10.1098	-4.47023	-1.54969	-1.52304	-2.18386	-0.862223
PD-MCI	HC	Hessen (2016)	EF	Inhibition	Stroop	Stroop Color-Word Test: interference condition	80.3	13	17.9	57.2	25	15.6	11.7251	34.4749	1.40832	1.37874	0.640341	2.11715
PD-MCI	HC	Hessen (2016)	EF	EF	Trail Making Test B	Trails B (seconds, reversed)	-207.6	13	93.1	-82.3	25	35.8	-167.731	-82.8689	-2.04788	-2.00488	-2.81254	-1.19721
PD-MCI	HC	Hessen (2016)	Verbal-wordlist	Verbal-memory-delay	Rey Auditory Verbal Learning Test (RAVLT)	RAVLT long delay (20 min)	6.3	13	2.5	9	25	2.1	-4.2543	-1.1457	-1.20467	-1.17937	-1.90011	-0.458635
PD-MCI	HC	Hessen (2016)	Verbal-wordlist	Verbal-memory	Rey Auditory Verbal Learning Test (RAVLT)	RAVLT Learning 5 trial sum	36.2	13	9.3	45.3	25	8.6	-15.2301	-2.96993	-1.02947	-1.00785	-1.71531	-0.300393
MCI-DLB	MCI-AD	Jicha (2010)	EF	EF	Trail Making Test B	Trails B (seconds, reversed)	197.3	9	98	180	12	72.6	-60.4422	95.0422	0.205381	0.197146	-0.669171	1.06346
MCI-DLB	MCI-AD	Jicha (2010)	EF	Verbal fluency	Verbal fluency phonemic	Phonemic fluency (COWAT)	30.7	9	12.5	38.8	12	9.1	-17.9427	1.74268	-0.759527	-0.72907	-1.62102	0.162875
MCI-DLB	MCI-AD	Jicha (2010)	Verbal-logicalmemory	Verbal-memory-recall-immediate	Logical memory (WMS I)	Logical Memory (WMS I): immediate recall	11.8	9	3.1	9.4	12	4.1	-1.02588	5.82588	0.646564	0.620637	-0.263773	1.50505
MCI-DLB	MCI-AD	Jicha (2010)	Att-Psychomotor	Psychomotor	Trail Making Test A	Trails A (seconds, reversed)	93.5	9	29.6	73.4	12	28.4	-6.58334	46.7833	0.695229	0.66735	-0.220165	1.55487
MCI-DLB	MCI-AD	Jicha (2010)	Verbal-naming	Naming	Boston Naming Test (BNT)	Boston Naming Test	14.2	9	1	13.4	12	1.7	-0.535618	2.13562	0.552815	0.530647	-0.348389	1.40968
MCI-DLB	MCI-AD	Jicha (2010)	Verbal-memory	Verbal-memory-recall-delay	CERAD word list	CERAD word list delayed recall	4.9	9	2.2	3.9	12	2.1	-0.977553	2.97755	0.466707	0.447992	-0.426827	1.32281
MCI-DLB	MCI-AD	Jicha (2010)	Verbal-memory	Verbal-memory-recall-delay	CERAD word list	CERAD word list total learned	16.3	9	4.2	15.8	12	3.4	-2.96808	3.96808	0.133062	0.127726	-0.7374	0.992851
MCI-DLB	MCI-AD	Jicha (2010)	EF	Verbal fluency	Verbal fluency animals	Category fluency (animals)	13.8	9	3.8	12.6	12	3.3	-2.048	4.448	0.340987	0.327313	-0.5426	1.19723
PD-MCI	HC	Peraza (2017)	EF	Planning	Tower of London	Tower of London	14.11	36	2.5	17.27	29	1.22	-4.17379	-2.14621	-1.55423	-1.53535	-2.09108	-0.979631
PD-MCI	HC	Peraza (2017)	VS-WM	VS-WM	Pattern recognition memory (CANTAB)	Pattern recognition memory (CANTAB)	83.9	37	17.27	98	30	2.5	-20.4592	-7.74075	-1.08792	-1.07512	-1.58991	-0.560332
PD-MCI	HC	Peraza (2017)	Psychomotor	Attention	Power of Attention	Power of Attention	-1400.65	37	172.04	-1217.46	30	101.175	-254.226	-112.154	-1.26535	-1.25046	-1.77648	-0.724441
PD-MCI	HC	Peraza (2017)	VS-WM	VS-WM	Spatial Recognition Memory (CANTAB)	Spatial Recognition Memory (CANTAB) correct answers	18.02	36	2.8	21.89	29	1.61	-5.04019	-2.69981	-1.64903	-1.62901	-2.19255	-1.06546
PD-MCI	HC	Poletti (2012)	EF	EF	Card sorting	Card Sorting: categories Achieved (Wisconsin Modified)	3.1	18	0.9	4.8	100	1.2	-2.28871	-1.11129	-1.46439	-1.45482	-1.98987	-0.919767
PD-MCI	HC	Poletti (2012)	EF	EF	Card sorting	Card Sorting: perseverative errors (Modified)	-4.9	18	2.5	-3.1	100	3	-3.28689	-0.313105	-0.613903	-0.60989	-1.11771	-0.102068
PD-MCI	HC	Poletti (2012)	EF	Frontal	Frontal-assessment-battery	Frontal Assessment Battery	12.8	18	2.5	16.7	100	1.8	-4.87297	-2.92703	-2.03271	-2.01942	-2.58352	-1.45532
PD-MCI	HC	Poletti (2012)	EF	Inhibition	Stroop	Stroop Color-Word Test: interference condition	25.5	18	17.2	17	100	7.8	3.54998	13.45	0.870801	0.865109	0.351289	1.37893
PD-MCI	HC	Poletti (2012)	EF	Inhibition	Stroop	Stroop Color-Word Test: interference errors	1.7	18	3.4	0.4	100	1.2	0.43298	2.16702	0.760363	0.755394	0.244398	1.26639
PD-MCI	HC	Poletti (2012)	EF	EF	Trail Making Test B	Trails B (seconds, reversed)	-147.4	18	45.4	-81.3	100	34	-84.3044	-47.8956	-1.84134	-1.8293	-2.38275	-1.27586
PD-MCI	HC	Poletti (2012)	EF	Verbal fluency	Verbal fluency phonemic	Phonemic fluency	25.5	18	8.6	34.3	100	10.1	-13.8176	-3.78239	-0.889392	-0.883579	-1.39791	-0.369247
PD-MCI	HC	Poletti (2012)	EF	Verbal fluency	Verbal fluency unspecified	Semantic fluency: category unspecified	13.4	18	1.4	13.3	100	2.2	-0.965901	1.1659	0.0475763	0.0472653	-0.454597	0.549127
PD-MCI	HC	Poletti (2012)	VS-WM	VS-WM	Corsi Test	Corsi Test	4.2	18	0.4	4.9	100	0.6	-0.99162	-0.40838	-1.21727	-1.20932	-1.73432	-0.684308
PD-MCI	HC	Poletti (2012)	Att-Psychomotor	Psychomotor	Trail Making Test A	Trails A (seconds, reversed)	-101.3	18	51.5	-45.1	100	20.1	-69.9343	-42.4657	-2.0751	-2.06153	-2.62811	-1.49496
PD-MCI	HC	Poletti (2012)	Verbal-naming	Naming	Boston Naming Test (BNT)	Boston Naming Test: short form	23.9	18	2.6	27.2	100	0.5	-3.85645	-2.74355	-3.0074	-2.98774	-3.61793	-2.35756
PD-MCI	HC	Poletti (2012)	Verbal-wordlist	Verbal-memory	Rey Auditory Verbal Learning Test (RAVLT)	RAVLT Learning 5 trial sum	28	18	5.6	41.9	100	7.1	-17.3994	-10.4006	-2.01432	-2.00115	-2.56419	-1.43811
PD-MCI	HC	Poletti (2012)	Verbal-wordlist	Verbal-memory-delay	Rey Auditory Verbal Learning Test (RAVLT)	RAVLT Long Delay (20 min)	5.2	18	1.5	9	100	2.3	-4.91617	-2.68383	-1.72647	-1.71519	-2.26265	-1.16773
PD-MCI	HC	Poletti (2012)	VS-Benton	VS-Benton	Benton JOLO	Benton Judgement of Line Orientation test	17.5	18	5.2	24.8	100	2.8	-8.95523	-5.64477	-2.23651	-2.22189	-2.79825	-1.64553
PD-MCI	HC	Poletti (2012)	VS-constructive	VS-figurecopy	Rey-Osterrieth Complex Figure	Rey-Osterrieth Complex Figure: copy	21.7	18	7.3	34	100	2.9	-14.2632	-10.3368	-3.1772	-3.15643	-3.79986	-2.513
PD-MCI	HC	Poletti (2012)	VS-learning&memory	VS-figurecopy-recall-delayed	Rey-Osterrieth Complex Figure	Rey-Osterrieth Complex Figure: delayed recall (unspecified)	9	18	6.1	17.1	100	4.1	-10.3565	-5.8435	-1.82036	-1.80846	-2.36078	-1.25613
PD-MCI	HC	Poletti (2012)	VS-learning&memory	VS-figurecopy-recall-immediate	Rey-Osterrieth Complex Figure	Rey-Osterrieth Complex Figure: immediate recall	8.9	18	5	17.6	100	5	-11.2356	-6.16442	-1.74	-1.72863	-2.27678	-1.18048
PD-MCI	HC	Sanyal (2014)	EF	Verbal fluency	Verbal fluency animals	Semantic fluency: animals	11.37	90	0.88	16.7	280	2.42	-5.84256	-4.81744	-2.47778	-2.47246	-2.76934	-2.17558
PD-MCI	HC	Sanyal (2014)	Verbal-naming	Naming	Boston Naming Test (BNT)	Boston Naming Test: abridged	10.36	90	0.92	12.92	280	1.98	-2.9847	-2.1353	-1.43626	-1.43318	-1.69215	-1.17421
PD-MCI	HC	Sanyal (2014)	VS-constructive	VS-figurecopy	Constructional Praxis	Constructional Praxis	-2.65	90	0.56	-0.819	280	0.54	-1.96084	-1.70116	-3.36022	-3.35302	-3.69179	-3.01425
PD-MCI	HC	Sanyal (2014)	VS-constructive	VS-figurecopy	Constructional Praxis	Constructional Praxis: copy	2.65	90	0.56	0.819	280	0.54	1.70116	1.96084	3.36022	3.35302	3.01425	3.69179
PD-MCI	HC	Sanyal (2014)	VS-learning&memory	VS-figurecopy-recall	Constructional Praxis	Constructional Praxis: recall	3.53	90	1.28	2.16	280	1.09	1.09864	1.64136	1.20296	1.20038	0.947627	1.45313
PD-MCI	HC	Sanyal (2014)	VS-learning&memory	VS-figurecopy-recall	Constructional Praxis	Constructional Praxis: recall (unspecified)	-3.53	90	1.28	-2.16	280	1.09	-1.64136	-1.09864	-1.20296	-1.20038	-1.45313	-0.947627
PD-MCI	HC	Song (2008)	EF	Inhibition	Go-no-go	Go-no-go test	17.1	20	4.39	19.48	33	1.3	-4.01308	-0.746917	-0.829103	-0.816583	-1.39334	-0.239828
PD-MCI	HC	Song (2008)	EF	Verbal fluency	Verbal fluency animals	Semantic fluency: animals	13.75	20	3.55	18.24	33	5.04	-7.07419	-1.90581	-0.988466	-0.973541	-1.55906	-0.388025
PD-MCI	HC	Song (2008)	EF	Verbal fluency	Verbal fluency phonemic	Phonemic fluency (COWAT)	22.2	20	10.27	31.45	33	11.46	-15.526	-2.97402	-0.838494	-0.825833	-1.40306	-0.248601
PD-MCI	HC	Song (2008)	Verbal-WM-DigitB	WM/att-Digit-backward	Digit span backward	Digit span backward	3.7	20	1.08	3.69	33	1.61	-0.806722	0.826722	0.00696571	0.00686053	-0.548551	0.562273
PD-MCI	HC	Song (2008)	WMcapacity-digitF	WM-Digit-forward	Digit span forward	Digit span forward	5.8	20	1.47	7.85	33	0.83	-2.68281	-1.41719	-1.84297	-1.81514	-2.46927	-1.16101
PD-MCI	HC	Song (2008)	Verbal-naming	Naming	Boston Naming Test (BNT)	Boston Naming Test	49.45	20	5.2	52.12	33	6.33	-6.04601	0.706008	-0.449933	-0.443139	-1.00492	0.118642
PD-MCI	HC	Song (2008)	Verbal-wordlist	Verbal-memory	Hopkins Verbal Learning Test (HVLT)	HVLT	18.85	20	4.42	22.84	33	3.39	-6.1555	-1.8245	-1.04822	-1.03239	-1.62155	-0.443237
PD-MCI	HC	Song (2008)	Verbal-wordlist	Verbal-memory	Hopkins Verbal Learning Test (HVLT)	HVLT	21.25	20	1.77	21.36	33	1.51	-1.02695	0.806945	-0.0682479	-0.0672173	-0.622775	0.488341
PD-MCI	HC	Song (2008)	Verbal-wordlist	Verbal-memory-delay	Hopkins Verbal Learning Test (HVLT)	HVLT (25 min)	5.95	20	2.28	7.88	33	1.58	-2.99478	-0.865216	-1.03118	-1.01561	-1.60371	-0.427512
PD-MCI	HC	Song (2008)	VS-learning&memory	VS-figurecopy-recog	Rey Figure	Rey Figure - Recognition	19.7	20	2.03	20.61	33	1.06	-1.7615	-0.0584953	-0.607987	-0.598806	-1.16579	-0.031818
PD-MCI	HC	Song (2008)	VS-constructive	VS-figurecopy	Rey-Osterrieth Complex Figure	Rey-Osterrieth Complex Figure: copy	32.2	20	3.74	33.23	33	1.91	-2.58802	0.528017	-0.376101	-0.370422	-0.930291	0.189447
PD-MCI	HC	Song (2008)	VS-learning&memory	VS-figurecopy-recall-delayed	Rey-Osterrieth Complex Figure	Rey-Osterrieth Complex Figure: delayed recall (20 min)	14	20	7.99	17.08	33	5.61	-6.83351	0.673512	-0.466823	-0.459774	-1.02204	0.10249
PD-MCI	HC	Song (2008)	VS-learning&memory	VS-figurecopy-recall-immediate	Rey-Osterrieth Complex Figure	Rey-Osterrieth Complex Figure: immediate recall	15.28	20	7.61	17.27	33	4.91	-5.43654	1.45654	-0.328481	-0.323521	-0.882335	0.235294
PD-MCI	HC	Wang (2015)	EF	Frontal	Frontal-assessment-battery	Frontal Assessment Battery	14.34	96	1.52	16.16	163	1.48	-2.19873	-1.44127	-1.21746	-1.21366	-1.48661	-0.940698
PD-MCI	HC	Wang (2015)	EF	Inhibition	Stroop	Stroop Color-Word Test: interference condition	19.64	96	9.24	15.34	163	4.97	2.56073	6.03927	0.626354	0.624394	0.366569	0.882219
PD-MCI	HC	Wang (2015)	EF	Verbal fluency	Verbal fluency phonemic	Phonemic fluency: "phonological" unspecified	7.14	96	2.28	10.25	163	3.36	-3.87165	-2.34835	-1.03449	-1.03125	-1.29859	-0.763912
PD-MCI	HC	Wang (2015)	EF	Verbal fluency	Verbal fluency unspecified	Semantic fluency: category unspecified	13.23	96	2.36	15.26	163	3.23	-2.77448	-1.28552	-0.690813	-0.688652	-0.947687	-0.429616
PD-MCI	HC	Wang (2015)	Verbal-WM-DigitB	WM/att-Digit-backward	Digit span backward	Digit span backward	3.51	96	0.83	4.17	163	0.89	-0.879984	-0.440016	-0.760102	-0.757725	-1.01819	-0.497263
PD-MCI	HC	Wang (2015)	WMcapacity-digitF	WM-Digit-forward	Digit span forward	Digit span forward	6.81	96	1.02	7.89	163	1.07	-1.34647	-0.813529	-1.02682	-1.0236	-1.29072	-0.756485
PD-MCI	HC	Wang (2015)	Verbal-wordlist	Verbal-memory	Hopkins Verbal Learning Test (HVLT)	HVLT	8.72	96	1.25	8.79	163	1.73	-0.467697	0.327697	-0.0445927	-0.0444532	-0.296638	0.207731
PD-MCI	HC	Wang (2015)	Verbal-wordlist	Verbal-memory-delay	Hopkins Verbal Learning Test (HVLT)	HVLT (20 min)	4.31	96	1.62	6.13	163	1.47	-2.20691	-1.43309	-1.19175	-1.18802	-1.46014	-0.915903
PD-MCI	HC	Wang (2015)	Verbal-wordlist	Verbal-memory	Hopkins Verbal Learning Test (HVLT)	HVLT 3 trial sum	17.5	96	2.89	19.45	163	3.65	-2.80859	-1.09141	-0.575394	-0.573594	-0.830542	-0.316646
PD-MCI	HC	Wang (2015)	Verbal-learning&memory	Verbal-similarities	Similiarities	Similiarities	15.72	96	2.43	16.81	163	2.87	-1.77801	-0.401988	-0.401374	-0.400118	-0.654617	-0.145619
PD-MCI	HC	Wang (2015)	VS-Benton	VS-Benton	Benton Judgement of Line Orientation	Benton Judgement of Line Orientation test	14.44	96	1.52	21.22	163	2.58	-7.34932	-6.21068	-3.01709	-3.00765	-3.36913	-2.64617
PD-MCI	HC	Wang (2015)	VS-constructive	VS-figurecopy	Clock Drawing Test	Clock Drawing Test	8.18	96	1.12	8.98	163	1.11	-1.08216	-0.517844	-0.718322	-0.716075	-0.975661	-0.456488
MCI-DLB	MCI-AD	Yoon (2015)	EF	Inhibition	Stroop	Stroop word test	97.1	18	24.7	99.6	32	9.3	-12.2687	7.2687	-0.151604	-0.149224	-0.727424	0.428976
MCI-DLB	MCI-AD	Yoon (2015)	EF	Inhibition	Stroop	Stroop: color test	58.2	18	26	72.5	32	14.7	-25.8322	-2.7678	-0.734566	-0.723033	-1.31763	-0.128439
MCI-DLB	MCI-stable	Yoon (2015)	EF	Inhibition	Stroop	Stroop word test	97.1	18	24.7	105.2	45	14.7	-18.1673	1.96732	-0.448691	-0.443059	-0.995114	0.108996
MCI-DLB	MCI-stable	Yoon (2015)	EF	Inhibition	Stroop	Stroop: color test	58.2	18	26	79.4	45	16.3	-32.0715	-10.3285	-1.08748	-1.07383	-1.6517	-0.495959
MCI-DLB	MCI-AD	Yoon (2015)	EF	Verbal fluency	Verbal fluency animals	COWAT animal	10.5	18	3	11.3	32	2.2	-2.28846	0.688457	-0.318391	-0.313392	-0.89411	0.267325
MCI-DLB	MCI-stable	Yoon (2015)	EF	Verbal fluency	Verbal fluency animals	COWAT animal	10.5	18	3	13.1	45	4.1	-4.73329	-0.466713	-0.679673	-0.671142	-1.23017	-0.112113
MCI-DLB	MCI-AD	Yoon (2015)	EF	Verbal fluency	Verbal fluency phonemic	Phonemic generative naming	12.7	18	8.1	13.5	32	6	-4.83898	3.23898	-0.117334	-0.115492	-0.693396	0.462411
MCI-DLB	MCI-stable	Yoon (2015)	EF	Verbal fluency	Verbal fluency phonemic	Phonemic generative naming	12.7	18	8.1	17.2	45	9.1	-9.42572	0.425716	-0.509471	-0.503076	-1.0567	0.0505454
MCI-DLB	MCI-AD	Yoon (2015)	EF	Verbal fluency	Verbal fluency supermarket	COWAT supermarket	11.2	18	0.6	12.3	32	3.1	-2.59089	0.390886	-0.437074	-0.430212	-1.0138	0.153372
MCI-DLB	MCI-stable	Yoon (2015)	EF	Verbal fluency	Verbal fluency supermarket	COWAT supermarket	11.2	18	0.6	14.8	45	4.4	-5.69144	-1.50856	-0.959917	-0.947868	-1.51898	-0.376754
MCI-DLB	MCI-AD	Yoon (2015)	Verbal-WM-DigitB	WM/att-Digit-backward	Digit span backward	Digit span backward	2.5	18	0.7	2.6	32	0.9	-0.594447	0.394447	-0.119808	-0.117927	-0.69585	0.459995
MCI-DLB	MCI-stable	Yoon (2015)	Verbal-WM-DigitB	WM/att-Digit-backward	Digit span backward	Digit span backward	2.5	18	0.7	3.1	45	0.8	-1.03132	-0.168682	-0.775763	-0.766026	-1.32876	-0.203291
MCI-DLB	MCI-AD	Yoon (2015)	WMcapacity-digitF	WM-Digit-forward	Digit span forward	Digit span forward	4.5	18	1.1	5.1	32	1.2	-1.29047	0.0904678	-0.514772	-0.50669	-1.09263	0.0792472
MCI-DLB	MCI-stable	Yoon (2015)	WMcapacity-digitF	WM-Digit-forward	Digit span forward	Digit span forward	4.5	18	1.1	5.6	45	1.2	-1.75414	-0.445862	-0.937776	-0.926004	-1.49602	-0.355984
MCI-DLB	MCI-AD	Yoon (2015)	Verbal-naming	Naming	Boston Naming Test (BNT)	Boston Naming Test: Korean version	37.7	18	5.5	36.7	32	4.8	-1.9969	3.9969	0.197667	0.194564	-0.384154	0.773282
MCI-DLB	MCI-stable	Yoon (2015)	Verbal-naming	Naming	Boston Naming Test (BNT)	Boston Naming Test: Korean version	37.7	18	5.5	42	45	9.3	-8.99292	0.392923	-0.510977	-0.504563	-1.05822	0.0490995
MCI-DLB	MCI-AD	Yoon (2015)	Verbal-language	Verbal	Calculation	Calculation (language and related)	9.5	18	1.6	9.6	32	1.6	-1.04782	0.847822	-0.0625	-0.0615187	-0.639105	0.516067
MCI-DLB	MCI-stable	Yoon (2015)	Verbal-language	Verbal	Calculation	Calculation (language and related)	9.5	18	1.6	10.4	45	1.7	-1.83283	0.0328298	-0.538042	-0.531288	-1.08571	0.0231356
MCI-DLB	MCI-AD	Yoon (2015)	Verbal-language	Verbal	Repetition	Repetition (language and related)	13.5	18	1.1	13.2	32	0.5	-0.155023	0.755023	0.390567	0.384435	-0.19792	0.96679
MCI-DLB	MCI-stable	Yoon (2015)	Verbal-language	Verbal	Repetition	Repetition (language and related)	13.5	18	1.1	14.3	45	0.9	-1.33533	-0.264675	-0.83339	-0.822929	-1.38811	-0.25775
MCI-DLB	MCI-AD	Yoon (2015)	Verbal-memory	Verbal-memory-recall-delay	Seoul Verbal Learning Test (SVLT)	SVLT Delayed recall (Seoul Verbal Learning Test)	3.8	18	2	2.1	32	1.1	0.82172	2.57828	1.14663	1.12863	0.510248	1.74701
MCI-DLB	MCI-AD	Yoon (2015)	Verbal-memory	Verbal-memory-recall	Seoul Verbal Learning Test (SVLT)	SVLT Free recall (Seoul Verbal Learning Test)	15.1	18	4.4	13.9	32	2.1	-0.645441	3.04544	0.385202	0.379154	-0.203068	0.961376
MCI-DLB	MCI-AD	Yoon (2015)	Verbal-memory	Verbal-memory-recog	Seoul Verbal Learning Test (SVLT)	SVLT recognition (Seoul Verbal Learning Test)	18.1	18	2.2	16.7	32	1.8	0.244209	2.55579	0.717556	0.70629	0.112469	1.30011
MCI-DLB	MCI-stable	Yoon (2015)	Verbal-memory	Verbal-memory-recall-delay	Seoul Verbal Learning Test (SVLT)	SVLT Delayed recall (Seoul Verbal Learning Test)	3.8	18	2	6.5	45	3.5	-4.45916	-0.94084	-0.855922	-0.845178	-1.41136	-0.279
MCI-DLB	MCI-stable	Yoon (2015)	Verbal-memory	Verbal-memory-recall	Seoul Verbal Learning Test (SVLT)	SVLT Free recall (Seoul Verbal Learning Test)	15.1	18	4.4	17.1	45	4.1	-4.33427	0.334271	-0.47781	-0.471812	-1.02459	0.0809691
MCI-DLB	MCI-stable	Yoon (2015)	Verbal-memory	Verbal-memory-recog	Seoul Verbal Learning Test (SVLT)	SVLT recognition (Seoul Verbal Learning Test)	18.1	18	2.2	19.2	45	2.3	-2.36734	0.167342	-0.484033	-0.477957	-1.0309	0.074985
MCI-DLB	MCI-AD	Yoon (2015)	VS-constructive	VS-figurecopy	Rey Complex Figure Test (RCFT)	Rey Complex Figure Test (RCFT)	27.9	18	7.1	30.2	32	2.3	-5.03206	0.432063	-0.498705	-0.490876	-1.0763	0.094544
MCI-DLB	MCI-AD	Yoon (2015)	VS-learning&memory	VS-figurecopy-recall-delayed	Rey Complex Figure Test (RCFT)	Rey Complex Figure Test: delayed recall	9.2	18	4.9	8.1	32	5.2	-1.91868	4.11868	0.215865	0.212476	-0.366483	0.791436
MCI-DLB	MCI-AD	Yoon (2015)	VS-learning&memory	VS-figurecopy-recall-immediate	Rey Complex Figure Test (RCFT)	Rey Complex Figure Test: immediate recall	10.3	18	5.2	8.3	32	4.1	-0.677777	4.67778	0.442448	0.435502	-0.148232	1.01924
MCI-DLB	MCI-AD	Yoon (2015)	VS-learning&memory	VS-figurecopy-recog	Rey Complex Figure Test (RCFT)	Rey Complex Figure Test: recognition	16.1	18	1.8	16.6	32	2.1	-1.68413	0.68413	-0.250137	-0.24621	-0.825682	0.333263
MCI-DLB	MCI-stable	Yoon (2015)	VS-constructive	VS-figurecopy	Rey Complex Figure Test (RCFT)	Rey Complex Figure Test (RCFT)	27.9	18	7.1	32.7	45	3.3	-7.40997	-2.19003	-1.02561	-1.01274	-1.58723	-0.438236
MCI-DLB	MCI-stable	Yoon (2015)	VS-learning&memory	VS-figurecopy-recall-delayed	Rey Complex Figure Test (RCFT)	Rey Complex Figure Test: delayed recall	9.2	18	4.9	11.3	45	4.8	-4.79247	0.592466	-0.434956	-0.429496	-0.981224	0.122232
MCI-DLB	MCI-stable	Yoon (2015)	VS-learning&memory	VS-figurecopy-recall-immediate	Rey Complex Figure Test (RCFT)	Rey Complex Figure Test: immediate recall	10.3	18	5.2	13.2	45	5.4	-5.88075	0.0807456	-0.542562	-0.535751	-1.09031	0.0188035
MCI-DLB	MCI-stable	Yoon (2015)	VS-learning&memory	VS-figurecopy-recog	Rey Complex Figure Test (RCFT)	Rey Complex Figure Test: recognition	16.1	18	1.8	18.5	45	1.4	-3.24881	-1.55119	-1.57679	-1.557	-2.16748	-0.946516
PD-MCI	HC	Yu (2012)	EF	EF	Card sorting	Card Sorting: categories Achieved (Modified)	4.2	44	1.95	5.96	84	1.22	-2.31586	-1.20414	-1.16607	-1.15876	-1.55015	-0.767373
PD-MCI	HC	Yu (2012)	EF	EF	Card sorting	Card Sorting: perseverative errors (Modified)	-4.66	44	5.22	-2.33	84	2.75	-3.72172	-0.938276	-0.616568	-0.612707	-0.985092	-0.240321
PD-MCI	HC	Yu (2012)	EF	Matrix Reasoning	Matrix Reasoning (WAIS-II)	Matrix Reasoning (WAIS-II)	9.65	44	2.52	11.86	84	2.46	-3.12357	-1.29643	-0.890899	-0.88532	-1.26584	-0.504795
PD-MCI	HC	Yu (2012)	EF	Verbal fluency	Verbal fluency food	Semantic fluency: fruit, fish, vegetable	35.52	44	8.33	39.25	84	8.16	-6.75668	-0.703322	-0.453859	-0.451016	-0.81992	-0.0821128
PD-MCI	HC	Yu (2012)	Verbal-WM-DigitB	WM/att-Digit-backward	Digit span backward	Digit span backward	4.7	44	1.58	5.49	84	1.61	-1.37918	-0.200816	-0.493804	-0.490711	-0.860374	-0.121048
PD-MCI	HC	Yu (2012)	WMcapacity-digitF	WM-Digit-forward	Digit span forward	Digit span forward	7.65	44	1.33	7.78	84	1.46	-0.651844	0.391844	-0.0917447	-0.0911701	-0.456084	0.273744
PD-MCI	HC	Yu (2012)	Processing-speed	Processing speed	Digit Symbol Substitution Test (DSST)	Digit Symbol Substitution Test	9.7	44	2.19	11.85	84	2.28	-2.97852	-1.32148	-0.955687	-0.949702	-1.33255	-0.566855
PD-MCI	HC	Yu (2012)	Processing-speed	Processing-speed	Processing speed index	Processing speed index	98.79	44	11.73	110.47	84	10.89	-15.7988	-7.56124	-1.04437	-1.03783	-1.42409	-0.651566
PD-MCI	HC	Yu (2012)	Processing-speed	Processing-speed	Symbol searching	Symbol searching	9.86	44	2.53	11.98	84	2.11	-2.95309	-1.28691	-0.937176	-0.931306	-1.31347	-0.549138
PD-MCI	HC	Yu (2012)	Att-Psychomotor	Psychomotor	Trail Making Test A	Trails A (colour; seconds, reversed)	-70.71	44	35.09	-47.88	84	15.68	-31.7159	-13.9441	-0.9462	-0.940273	-1.32277	-0.557776
PD-MCI	HC	Yu (2012)	Attention-other-WM	WM	Working Memory index	Working Memory index	102.56	44	13.7	111.13	84	12.88	-13.4186	-3.72138	-0.65094	-0.646863	-1.02011	-0.273612
PD-MCI	HC	Yu (2012)	Verbal-logicalmemory	Verbal-memory-delay	Logical memory	Logical memory: delayed	16.32	44	9.99	24.04	84	9.16	-11.2008	-4.23922	-0.816806	-0.81169	-1.18974	-0.433637
PD-MCI	HC	Yu (2012)	Verbal-logicalmemory	Verbal-memory-immediate	Logical memory	Logical Memory: immediate	28.89	44	12.09	38.93	84	10.92	-14.2137	-5.86633	-0.885918	-0.88037	-1.26072	-0.500018
PD-MCI	HC	Yu (2012)	Verbal-logicalmemory	Verbal-memory-recog	Logical memory (WMS)	Logical memory: recognition (WMS)	22.48	44	4.34	25.73	84	6.57	-5.42448	-1.07552	-0.550436	-0.546989	-0.917835	-0.176142
PD-MCI	HC	Yu (2012)	Verbal-learning&memory	Verbal-similarities	Similarities (WAIS-III)	Similarities: WAIS-III	10.55	44	2.71	11.79	84	2.34	-2.15057	-0.329427	-0.501516	-0.498375	-0.868192	-0.128558
PD-MCI	HC	Yu (2012)	VS-learning&memory	VS-block-design	Block design (WAIS-III)	Block design (WAIS-III)	9.3	44	2.31	11.48	84	2.29	-3.02588	-1.33412	-0.949128	-0.943184	-1.32579	-0.560579
PD-MCI	HC	Yu (2012)	VS-learning&memory	VS-memory-recall-recog	Visual Reproduction (WMS-III)	Visual Reproduction (nonverbal, WMS-III): recognition	40.14	44	4.03	43.3	84	2.95	-4.39663	-1.92337	-0.94108	-0.935186	-1.3175	-0.552875
PD-MCI	HC	Yu (2012)	VS-learning&memory	VS-memory-recall-delay	Visual Reproduction (WMS-III)	Visual Reproduction (WMS-III): delayed (unspecified) recall	47.02	44	21.75	55.6	84	20.39	-16.2638	-0.896168	-0.411233	-0.408657	-0.77682	-0.0404949
PD-MCI	HC	Yu (2012)	VS-learning&memory	VS-memory-recall-immediate	Visual Reproduction (WMS-III)	Visual Reproduction (WMS-III): immediate recall	64.14	44	18.31	76.56	84	13.71	-18.1043	-6.7357	-0.80468	-0.79964	-1.17731	-0.421973
MCI-DLB	MCI-AD	Busse 2018	Visuospatial	Visuospatial	Qualitative Scoring Pentagon Test	Number of angles	3.21	19	0.15	3.7	25	0.13	-0.575329	-0.404671	-3.5271	-3.46361	-4.40144	-2.52578
MCI-DLB	MCI-AD	Busse 2018	Attention/ psychomotor	Attention/ psychomotor	Digit Cancellation task	Digit Cancellation task	44.36	19	1.63	48.93	25	1.41	-5.49637	-3.64363	-3.03006	-2.97552	-3.83711	-2.11393
MCI-DLB	MCI-AD	Busse 2018	Attention/ psychomotor	Attention/ psychomotor	Trail Making Test A	Seconds to complete (reversed)	-96.26	19	10.64	-67.93	25	9.2	-34.3757	-22.2843	-2.8782	-2.82639	-3.66577	-1.98701
MCI-DLB	MCI-AD	Busse 2018	Frontal/ EF	Frontal/ EF	Phonemic fluency	Phonemic fluency	28.56	19	2.42	31.49	25	2.19	-4.33741	-1.52259	-1.27869	-1.25568	-1.90734	-0.604012
MCI-DLB	MCI-AD	Busse 2018	Frontal/ EF	Frontal/ EF	Semantic fluency	Semantic fluency	30.53	19	2.73	33.56	25	2.47	-4.61751	-1.44249	-1.17231	-1.15121	-1.7944	-0.508023
MCI-DLB	MCI-AD	Busse 2018	Frontal/ EF	Frontal/ EF	Digit Span Backwards	Digit Span Backwards	3.6	19	0.22	3.57	25	0.2	-0.0982512	0.158251	0.143674	0.141088	-0.456163	0.738338
MCI-DLB	MCI-AD	Busse 2018	Verbal Memory	Verbal Memory	Immediate prose memory	Immediate prose memory	9.49	19	1.08	7.56	25	1.02	1.28745	2.57255	1.84488	1.81168	1.1052	2.51816
MCI-DLB	MCI-AD	Busse 2018	Verbal Memory	Verbal Memory	Delayed prose memory	Delayed prose memory	10.15	19	1.27	7.62	25	1.2	1.77422	3.28578	2.0561	2.01909	1.28847	2.7497
MCI-DLB	MCI-AD	Busse 2018	Verbal Memory	Verbal Memory	Free and Cued Selective Reminding (FCSRT)	FCSRT: Delayed Total Recall	11.26	19	0.47	10.09	25	0.41	0.901758	1.43824	2.67903	2.63081	1.81966	3.44196
MCI-DLB	MCI-AD	Busse 2018	Verbal Memory	Verbal Memory	Free and Cued Selective Reminding (FCSRT)	FCSRT: Immediate Total Recall	34.43	19	1.27	29.87	25	1.1	3.83777	5.28223	3.87798	3.80817	2.81374	4.80261
MCI-DLB	MCI-AD	Busse 2018	Visuoconstructive	Visuoconstructive	Rey-Osterrieth Complex Figure	ROCF copy	24.01	19	1.57	26.65	25	1.36	-3.53289	-1.74711	-1.81603	-1.78334	-2.48667	-1.08002
MCI-DLB	MCI-AD	Busse 2018	Visuospatial	Visuospatial	Clock drawing	Clock drawing	6.48	19	0.78	7.41	25	0.69	-1.37833	-0.481667	-1.27409	-1.25116	-1.90244	-0.599873
MCI-DLB	MCI-AD	Busse 2018	Visuospatial	Visuospatial	Qualitative Scoring Pentagon Test (total score)	Qualitative Scoring Pentagon Test (total score)	9.89	19	2.35	11.25	25	0.94	-2.40085	-0.319151	-0.802545	-0.788099	-1.40693	-0.169268
MCI-DLB	MCI-AD	Busse 2018	Visuospatial	Visuospatial	ROCF delayed recall	ROCF delayed recall	8.71	19	1.4	8.27	25	1.18	-0.345533	1.22553	0.344038	0.337845	-0.262839	0.93853
MCI-DLB	MCI-AD	Busse 2018	Working memory	Working memory	Digit Span Forward	Digit Span Forward	5.26	19	0.22	5.38	25	0.2	-0.248251	0.00825123	-0.574696	-0.564351	-1.17242	0.0437132
MCI-LB	MCI-AD	Donaghy 2018	Attention/ psychomotor	Attention/ psychomotor	Digit Vigilance (n identified)	Digit Vigilance (n identified)	30	41	6.3	33.3	24	4.6	-6.24708	-0.352919	-0.575109	-0.568124	-1.08124	-0.0550047
MCI-LB	MCI-AD	Donaghy 2018	Attention/ psychomotor	Attention/ psychomotor	Simple Reaction Time (coefficient of variance)	Simple Reaction Time (coefficient of variance)	0.26	41	0.16	0.31	24	0.25	-0.151522	0.0515216	-0.252953	-0.249881	-0.755449	0.255687
MCI-LB	MCI-AD	Donaghy 2018	Attention/ psychomotor	Attention/ psychomotor	Simple Reaction Time	Simple Reaction Time	404	41	155	404	24	146	-77.9529	77.9529	0	0	-0.50374	0.50374
MCI-LB	MCI-AD	Donaghy 2018	Attention/ psychomotor	Attention/ psychomotor	Choice Reaction Time errors	Choice Reaction Time errors	1.9	41	1.5	1.5	24	1.7	-0.40942	1.20942	0.253814	0.250731	-0.25485	0.756311
MCI-LB	MCI-AD	Donaghy 2018	Attention/ psychomotor	Attention/ psychomotor	Failed trails B (%)	Failed trails B (%)	26	41	63	11	24	46	-14.4708	44.4708	0.261413	0.258238	-0.247454	0.763931
MCI-LB	MCI-AD	Donaghy 2018	Attention/ psychomotor	Attention/ psychomotor	Choice Reaction Time (ms)	Choice Reaction Time (ms)	739	41	247	674	24	130	-43.8377	173.838	0.306734	0.303009	-0.203417	0.809435
MCI-LB	MCI-AD	Donaghy 2018	Attention/ psychomotor	Attention/ psychomotor	Digit Vigilance (coefficient of variance)	Digit Vigilance (coefficient of variance)	0.2	0.41	0.08	0.18	24	0.06	-0.173967	0.213967	0.336799	0.32518	-2.76315	3.41351
MCI-LB	MCI-AD	Donaghy 2018	Attention/ psychomotor	Attention/ psychomotor	Choice Reaction Time (coefficient of variance)	Choice Reaction Time (coefficient of variance)	0.26	41	0.09	0.23	24	0.09	-0.0162244	0.0762244	0.333333	0.329285	-0.177626	0.836195
MCI-LB	MCI-AD	Donaghy 2018	Attention/ psychomotor	Attention/ psychomotor	Failed trails A (%)	Failed trails A (%)	13	41	32	3	24	13	-3.7033	23.7033	0.374803	0.370251	-0.137494	0.877996
MCI-LB	MCI-AD	Donaghy 2018	Attention/ psychomotor	Attention/ psychomotor	Digit Vigilance (time, ms)	Digit Vigilance (time, ms)	584	41	72	551	24	76	-4.7425	70.7425	0.449068	0.443614	-0.0658659	0.953093
MCI-LB	MCI-AD	Donaghy 2018	Frontal/ EF	Frontal/ EF	CRT-SRT (ms)	CRT-SRT (ms)	333	41	126	270	24	98	3.13431	122.866	0.540494	0.53393	0.0218963	1.04596
MCI-LB	MCI-AD	Donaghy 2018	Frontal/ EF	Frontal/ EF	FAS	FAS	29	41	14.5	35.9	24	12.9	-14.0582	0.258194	-0.495079	-0.489066	-0.999773	0.0216417
MCI-LB	MCI-AD	Donaghy 2018	Verbal	Verbal	Graded Naming Test	Graded Naming Test	17.6	41	5.7	15.8	24	7.4	-1.47341	5.07341	0.282424	0.278993	-0.227025	0.785011
MCI-LB	MCI-AD	Donaghy 2018	Verbal Memory	Verbal Memory	Rey Auditory Verbal Learning Test (RAVLT)	RAVLT recognition	11.7	41	2.3	12.1	24	2.2	-1.5628	0.762802	-0.176678	-0.174532	-0.679165	0.330101
MCI-LB	MCI-AD	Donaghy 2018	Verbal Memory	Verbal Memory	Rey Auditory Verbal Learning Test (RAVLT)	RAVLT delayed recall	3.9	41	3.1	3.4	24	4.3	-1.34125	2.34125	0.139472	0.137778	-0.366519	0.642074
MCI-LB	MCI-AD	Donaghy 2018	Verbal Memory	Verbal Memory	Rey Auditory Verbal Learning Test (RAVLT)	RAVLT % trial 5 Recalled	54	41	51	37	24	39	-7.12691	41.1269	0.361889	0.357494	-0.149981	0.864969
MCI-LB	MCI-AD	Donaghy 2018	Visuospatial	Visuospatial	Angle Task	Angle Task (degree)	26.2	41	16.4	17.6	24	13.5	0.688094	16.5119	0.558272	0.551492	0.0389084	1.06407
prodromal DLB	HC	Kemp 2017	Attention/ psychomotor	Attention/ psychomotor	Digit symbol	Digit symbol (standard score/19)	8.18	37	3.23	11.69	29	2.65	-4.99149	-2.02851	-1.17386	-1.16005	-1.68489	-0.635221
prodromal DLB	HC	Kemp 2017	Attention/ psychomotor	Attention/ psychomotor	Trails A (seconds, reversed)	Seconds to complete (reversed)	64.89	37	34.11	40.62	29	11	11.0922	37.4478	0.912508	0.901773	0.391918	1.41163
prodromal DLB	HC	Kemp 2017	Attention/ psychomotor	Attention/ psychomotor	Trails B (seconds, reversed)	Seconds to complete (reversed)	139.13	37	79.2	90.34	29	31.56	17.5952	79.9848	0.774921	0.765804	0.262461	1.26915
prodromal DLB	HC	Kemp 2017	Frontal/ EF	Frontal/ EF	Formal Semantic evocation	Formal Semantic evocation	25	37	7.72	37.38	29	7.05	-16.0634	-8.6966	-1.66525	-1.64566	-2.207	-1.08432
prodromal DLB	HC	Kemp 2017	Frontal/ EF	Frontal/ EF	Digit Span Backwards	Digit Span Backwards	3.61	37	0.9	4.42	29	0.83	-1.24108	-0.378916	-0.930961	-0.920009	-1.43081	-0.409207
prodromal DLB	HC	Kemp 2017	Frontal/ EF	Frontal/ EF	Formal Lexical evocation	Formal Lexical evocation	17.28	37	7.42	23.55	29	7.11	-9.87992	-2.66008	-0.860555	-0.850431	-1.35771	-0.34315
prodromal DLB	HC	Kemp 2017	Frontal/ EF	Frontal/ EF	Front Assessment Battery	Front Assessment Battery	15.49	37	2.67	17.29	29	1.15	-2.86133	-0.738674	-0.840296	-0.83041	-1.33673	-0.324096
prodromal DLB	HC	Kemp 2017	Verbal	Verbal	Language (DO90 Oral Denomination-80 items)	Language (DO90 Oral Denomination-80 items)	77.61	37	2.78	79.62	29	0.62	-3.06283	-0.957173	-0.945906	-0.934778	-1.44636	-0.423196
prodromal DLB	HC	Kemp 2017	Verbal Memory	Verbal Memory	Free and Cued Selective Reminding	FCSRT: Immediate recall	15.11	37	1.72	15.9	29	0.31	-1.43717	-0.142833	-0.60481	-0.597695	-1.09437	-0.101023
prodromal DLB	HC	Kemp 2017	Verbal Memory	Verbal Memory	Free and Cued Selective Reminding	FCSRT: Delayed total recall	15.15	37	1.67	15.9	29	0.31	-1.37882	-0.121175	-0.590936	-0.583984	-1.08018	-0.0877869
prodromal DLB	HC	Kemp 2017	Verbal Memory	Verbal Memory	Free and Cued Selective Reminding	FCSRT: Recognition	15.79	37	0.59	15.89	29	0.31	-0.341635	0.141635	-0.205045	-0.202632	-0.689953	0.284688
prodromal DLB	HC	Kemp 2017	Visuoconstructive	Visuoconstructive	Rey-Osterrieth Complex Figure	Rey-Osterrieth Complex Figure: copy	31.44	37	5.25	34.37	29	1.82	-4.97001	-0.889986	-0.711612	-0.70324	-1.20392	-0.202562
prodromal DLB	HC	Kemp 2017	Visuospatial	Visuospatial	Visual Object and Space Perception battery	VOSP: nmumber location	8.47	37	1.78	9.46	29	0.81	-1.70272	-0.277283	-0.688219	-0.680122	-1.17987	-0.180374
prodromal DLB	HC	Kemp 2017	Visuospatial	Visuospatial	Visual Object and Space Perception battery	VOSP: dot counting	9.78	37	0.55	10	29	0	-0.424377	-0.0156226	-0.533333	-0.527059	-1.0214	-0.03272
prodromal DLB	HC	Kemp 2017	Visuospatial	Visuospatial	Visual Object and Space Perception battery	Visual Object and Space Perception battery: Screening	19.55	37	1.09	19.96	29	0.2	-0.820308	0.000307582	-0.495089	-0.489264	-0.982471	0.00394259
prodromal DLB	HC	Kemp 2017	Visuospatial	Visuospatial	Visual Object and Space Perception battery	VOSP: incomplete letters	18.85	37	1.66	19.41	29	0.8	-1.23025	0.110251	-0.413961	-0.409091	-0.900168	0.0819864
prodromal DLB	HC	Kemp 2017	Visuospatial	Visuospatial	Visual Object and Space Perception battery	VOSP: cube analysis	9.47	37	1.11	9.71	29	0.55	-0.690133	0.210133	-0.264167	-0.261059	-0.749188	0.22707
prodromal DLB	HC	Kemp 2017	Visuospatial	Visuospatial	Visual Object and Space Perception battery	VOSP: position discrimination	19.05	37	1.43	18.73	29	2.39	-0.626485	1.26648	0.167512	0.165541	-0.321372	0.652454
prodromal DLB	HC	Kemp 2017	Visuospatial Memory	Visuospatial Memory	Delayed Matching to Sample-48 items	Delayed Matching to Sample-48 items Set 2	44.23	37	4.73	47.1	29	0.94	-4.65444	-1.08556	-0.796874	-0.787499	-1.29181	-0.283183
prodromal DLB	HC	Kemp 2017	Visuospatial Memory	Visuospatial Memory	Delayed Matching to Sample-48 items	Delayed Matching to Sample-48 items Set 1	44.05	37	5.35	46.93	29	1.28	-4.91181	-0.848193	-0.702294	-0.694031	-1.19434	-0.193727
prodromal DLB	HC	Kemp 2017	Working memory	Working memory	Digit Span Forward	Digit Span Forward	5.25	37	1.13	5.92	29	1.02	-1.20671	-0.133293	-0.618509	-0.611232	-1.10838	-0.114081
DLB-MCI	AD-MCI	Sadiq 2017	Attention/ psychomotor	Attention/ psychomotor	Trail Making Test B	Trails B (seconds, reversed)	146.8	21	91.2	115.2	107	52.3	3.17649	60.0235	0.525112	0.521823	0.0496862	0.993961
DLB-MCI	AD-MCI	Sadiq 2017	Attention/ psychomotor	Attention/ psychomotor	Trail Making Test A	Trails A (seconds, reversed)	59.5	21	23.9	55.6	107	27.2	-8.71275	16.5128	0.146049	0.145134	-0.322994	0.613262
DLB-MCI	AD-MCI	Sadiq 2017	Frontal/ EF	Frontal/ EF	Letter Fluency	Letter Fluency	27.2	21	11.7	34.8	107	12	-13.2457	-1.95433	-0.63583	-0.631848	-1.106	-0.157698
DLB-MCI	AD-MCI	Sadiq 2017	Frontal/ EF	Frontal/ EF	Category Fluency	Category Fluency	14.4	21	6.1	15.2	107	5	-3.25147	1.65147	-0.154137	-0.153172	-0.621338	0.314995
DLB-MCI	AD-MCI	Sadiq 2017	Verbal Memory	Verbal Memory	Logical Memory Test Immediate	percentile	30.5	21	31	26.2	107	25.6	-8.23113	16.8311	0.162077	0.161062	-0.307144	0.629268
DLB-MCI	AD-MCI	Sadiq 2017	Verbal Memory	Verbal Memory	Logical Memory Test Delayed	percentile	23.9	21	26.4	15.5	107	22.7	-2.61775	19.4177	0.360105	0.35785	-0.11199	0.827689
DLB-MCI	AD-MCI	Sadiq 2017	Visuospatial	Visuospatial	Clock Drawing Test	Clock Drawing Test	3.8	21	0.9	4.2	107	1	-0.86515	0.0651501	-0.406172	-0.403628	-0.874024	0.0667679
